# Supplementary material
Source: PubMed Central journal article supplement (PMC2670905)

**Appendix 1:** Schedule of events for the pre-intervention period (usual care) and the post-intervention period (with the interactive voice response system). Note: CDSS = computerized decision support system, INR = international normalized ratio, IVRS = interactive voice response system.

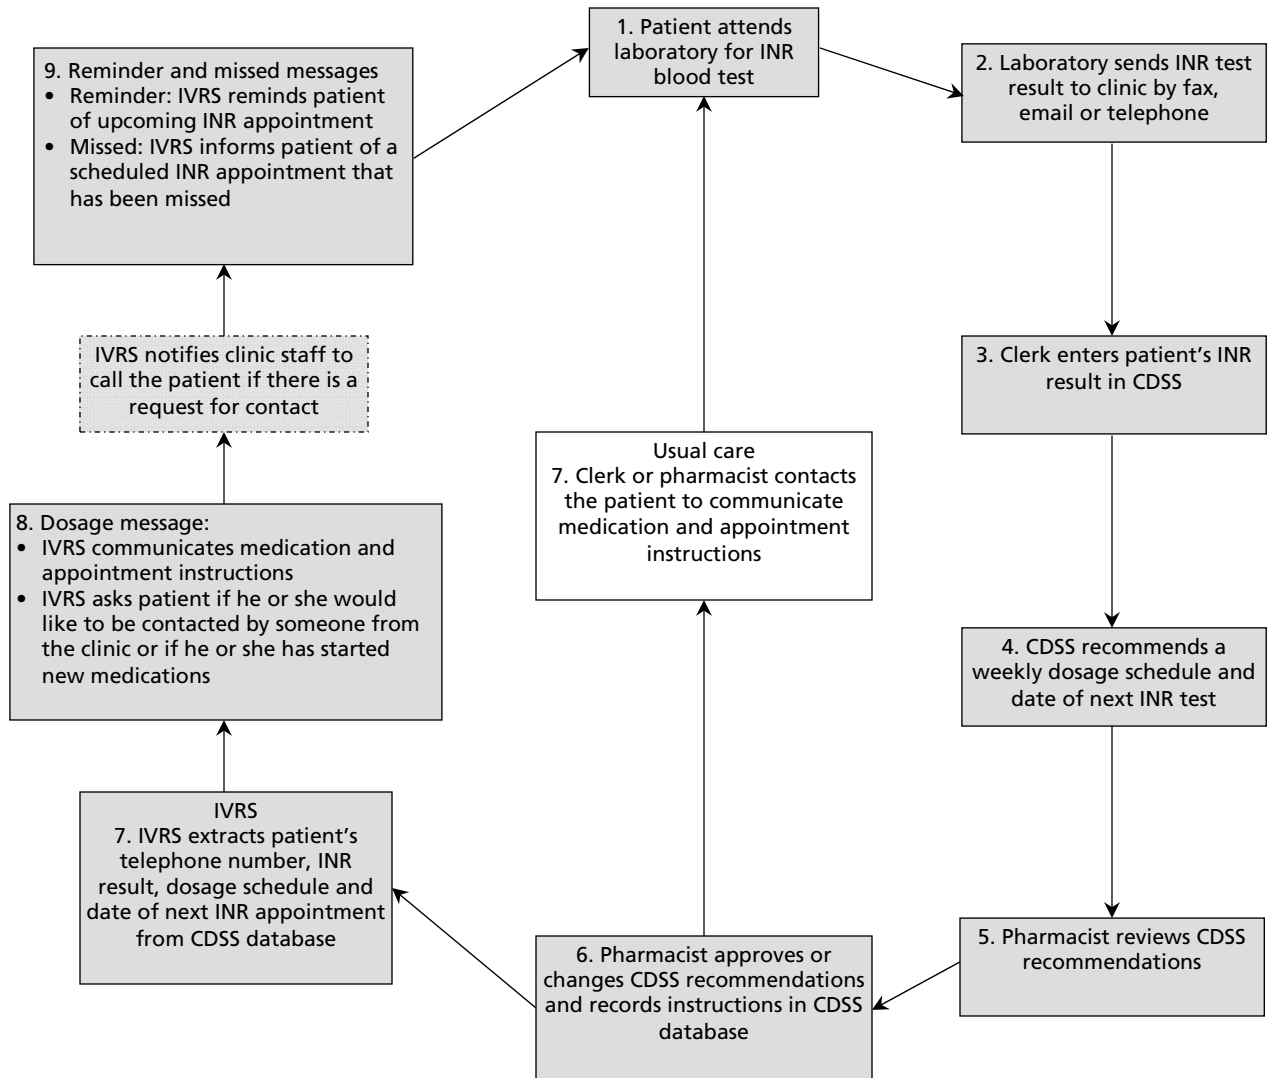

Supplement: supp_180_9_927_v2_1.pdf [file supp_180_9_927_v2_1.pdf]
